# Supplementary material
Source: publisher figshare collection journal article supplement (https://aacr.figshare.com/articles/dataset/_/22495110)

**CDCP1, Sjordahl 2012 data**

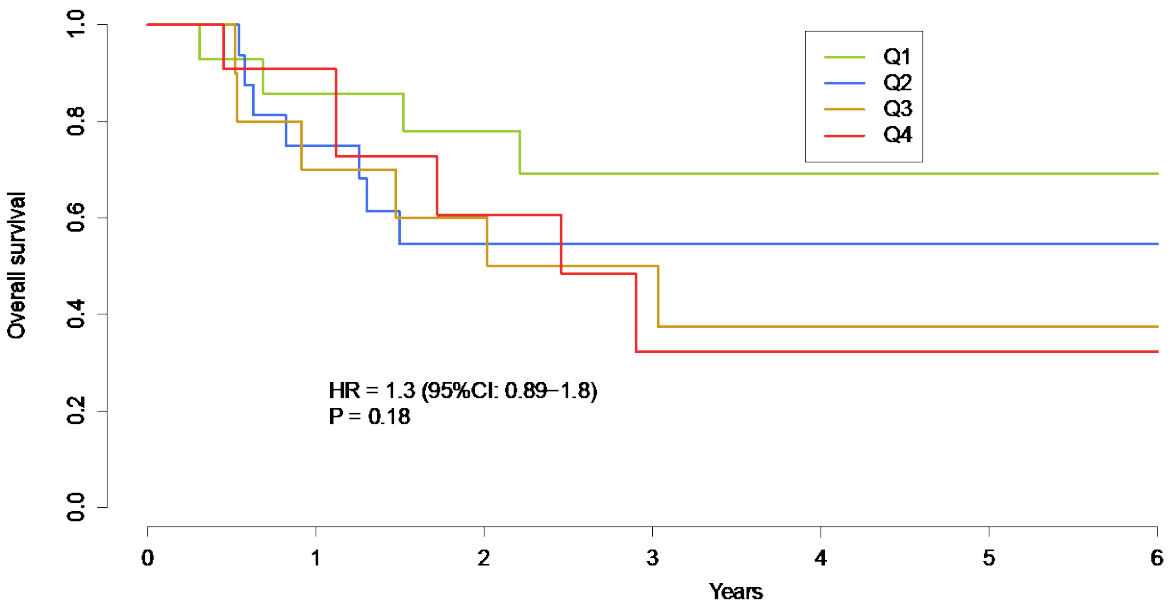

Number at risk

|    |    |    |   |   |   |   |    |
|----|----|----|---|---|---|---|----|
| 14 | 12 | 10 | 6 | 4 | 2 | 2 | Q1 |
| 16 | 11 | 6  | 6 | 6 | 5 | 3 | Q2 |
| 10 | 7  | 6  | 4 | 3 | 1 | 1 | Q3 |
| 11 | 10 | 5  | 2 | 2 | 2 | 2 | Q4 |

**CDCP1, TCGA Cell 2017 data**

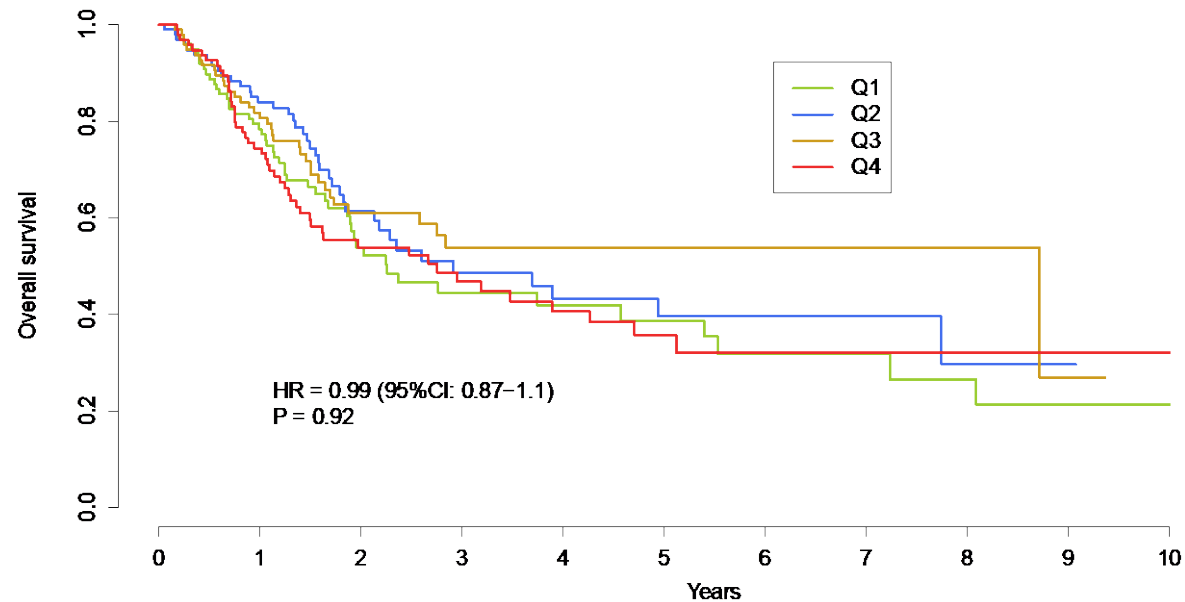

Number at risk

|     |    |    |    |    |    |   |   |   |   |   |    |
|-----|----|----|----|----|----|---|---|---|---|---|----|
| 101 | 73 | 32 | 20 | 15 | 12 | 7 | 6 | 5 | 4 | 2 | Q1 |
| 100 | 72 | 33 | 19 | 16 | 11 | 8 | 6 | 1 | 1 | 1 | Q2 |
| 100 | 73 | 37 | 22 | 16 | 14 | 6 | 4 | 4 | 1 | 1 | Q3 |
| 101 | 68 | 35 | 25 | 19 | 10 | 6 | 6 | 4 | 4 | 4 | Q4 |

Supplement: Supplementary file 1 [file 39952173]
